# Supplementary material for: Changes in Biology Self-Efficacy during a First-Year University Course
Source: Atypon-hosted journal article supplement (doi:10.1187/cbe.15-04-0092), 2016-05-19
Supplement: combinedsupmats.pdf [file combinedsupmats.pdf]

# Supplemental Material

*CBE—Life Sciences Education*

Ainscough *et al.*

**Supplementary table:** All study variables within high and low achieving groups for students who were not confident or confident when responding to item #8 on the Biology Self-Efficacy Scale “How confident are you that you will achieve a high grade (6 or above) in this biology course?” High achievers received a grade of 6 or 7 and low achievers received a failing grade (grades 1, 2 or 3).

|                                   | High achieving           |                              |                                  | Low achieving           |                              |                                  |
|-----------------------------------|--------------------------|------------------------------|----------------------------------|-------------------------|------------------------------|----------------------------------|
|                                   | All high achieving % (n) | Confident <sup>+</sup> % (n) | Not confident <sup>#</sup> % (n) | All low achieving % (n) | Confident <sup>+</sup> % (n) | Not confident <sup>#</sup> % (n) |
| <b>All students</b>               |                          | 76% 135                      | 24% (43)                         |                         | 40% (57)                     | 60% (84)                         |
| <b>Gender</b>                     |                          |                              |                                  |                         |                              |                                  |
| Male                              | 39% (69)                 | 44% (60)                     | 21% (9)                          | 40% (56)                | 47% (27)                     | 35% (29)                         |
| Female                            | 61% (109)                | 56% (75)                     | 79% (34)                         | 60% (85)                | 53% (30)                     | 65% (55)                         |
| <b>Degree</b>                     |                          |                              |                                  |                         |                              |                                  |
| Science & science related degrees | 52% (92)                 | 59% (79)                     | 30% (13)                         | 3% (4)                  | 5% (3)                       | 1% (1)                           |
| Dentistry                         | 17% (31)                 | 18% (24)                     | 16%(7)                           | 1% (1)                  | 2% (1)                       | 0% (0)                           |
| Human movement studies            | 11% (20)                 | 7% (10)                      | 23% (10)                         | 69% (97)                | 61% (35)                     | 74% (62)                         |
| Pharmacy                          | 20% (35)                 | 16% (22)                     | 30% (13)                         | 27% (39)                | 32% (18)                     | 25%(21)                          |
| <b>High school biology</b>        |                          |                              |                                  |                         |                              |                                  |
| Yes                               | 57% (101)                | 56% (75)                     | 63% (26)                         | 70% (94)                | 69% (35)                     | 71% (59)                         |
| No                                | 43% (75)                 | 44% (60)                     | 37% (15)                         | 30% (40)                | 31% (16)                     | 29% (24)                         |
| <b>High school chemistry</b>      |                          |                              |                                  |                         |                              |                                  |
| Yes                               | 93% (164)                | 94% (125)                    | 91% (39)                         | 57% (79)                | 66% (37)                     | 51% (42)                         |
| No                                | 7% (12)                  | 6% (8)                       | 9% (4)                           | 43% (60)                | 34% (19)                     | 49% (41)                         |

<sup>†</sup> Confident students responded as fairly confident (3), very confident (4) or totally confident (5) on the Likert scale in response to item #8 on the Biology Self-Efficacy Scale.

<sup>#</sup> Not confident students responded as not at all confident (1) or only a little confident (2) on the Likert scale in response to item #8 on the Biology Self-Efficacy Scale.
